# Supplementary material for: Fundamental luminescence properties of Mn4+ activated Ca14Al10Zn6O35 phosphor
Source: Royal Society of Chemistry journal article supplement (doi:10.1039/d2tc01906j), 2022-01-01
Supplement: d2tc01906j1.pdf [file d2tc01906j1.pdf]

## Fundamental luminescent properties of Mn<sup>4+</sup> activated Ca<sub>14</sub>Al<sub>10</sub>Zn<sub>6</sub>O<sub>35</sub> phosphor

Ting Lv,<sup>a</sup> Jiquan Huang,<sup>\*a,b</sup> Changliang Yang,<sup>a</sup> Yun Wang,<sup>a</sup> Qiufeng Huang,<sup>a</sup> Jian Chen,<sup>a</sup> Wang Guo<sup>\*a,b</sup>

---

<sup>a</sup> Key Laboratory of Optoelectronic Materials Chemistry and Physics, Fujian Institute of Research on the Structure of Matter, Chinese Academy of Sciences, Fuzhou, 350002, P. R. China. E-mail: [hjq@fjirsm.ac.cn](mailto:hjq@fjirsm.ac.cn), [guowang@fjirsm.ac.cn](mailto:guowang@fjirsm.ac.cn)

<sup>b</sup> Fujian Science & Technology Innovation Laboratory for Optoelectronic Information of China, Fuzhou, 350108, P. R. China

**Table S1.** Atom parameters of Ca<sub>14</sub>Al<sub>10</sub>Zn<sub>6</sub>O<sub>35</sub> host.

| Atom | x        | y         | z        | $B_{\text{eff}}, \text{\AA}^2$ | multiplicity |
|------|----------|-----------|----------|--------------------------------|--------------|
| Ca1  | 0.21405  | 0.00000   | 0.00000  | 0.306                          | 24f          |
| Ca2  | 0.61335  | 0.61335   | 0.61335  | 0.100                          | 16e          |
| Ca3  | 0.38734  | 0.38734   | 0.38734  | 0.100                          | 16e          |
| Zn1  | 0.17236  | 0.17236   | 0.17236  | 0.380                          | 16e          |
| Zn2  | 0.00000  | 0.00000   | 0.00000  | 0.100                          | 4a           |
| Al1  | 0.00000  | 0.00000   | 0.00000  | 0.100                          | 4a           |
| Zn3  | -0.00230 | 0.25000   | 0.25000  | 0.100                          | 24g          |
| Al2  | -0.00230 | 0.25000   | 0.25000  | 0.100                          | 24g          |
| Zn4  | 0.50000  | 0.50000   | 0.50000  | 0.120                          | 4b           |
| Al3  | 0.50000  | 0.50000   | 0.50000  | 0.120                          | 4b           |
| Zn5  | 0.85725  | 0.8571025 | 0.85725  | 0.130                          | 16e          |
| Al4  | 0.85725  | 0.8571025 | 0.85725  | 0.130                          | 16e          |
| O1   | 0.25000  | 0.25000   | 0.25000  | 0.460                          | 4c           |
| O2   | 0.36866  | 0.00000   | 0.00000  | 0.100                          | 24f          |
| O3   | -0.06593 | -0.06593  | -0.06593 | 0.560                          | 16e          |
| O4   | 0.06688  | 0.25747   | 0.34915  | 0.570                          | 48h          |
| O5   | 0.15329  | 0.25575   | 0.56745  | 0.640                          | 48h          |

**Table S2.** Atom parameters of CAZO:2.5%Mn phosphor.

| Atom | x        | y        | z        | $B_{\text{eff}}, \text{\AA}^2$ | multiplicity |
|------|----------|----------|----------|--------------------------------|--------------|
| Ca1  | 0.21420  | 0.00000  | 0.00000  | 0.306                          | 24f          |
| Ca2  | 0.61310  | 0.61310  | 0.61310  | 0.100                          | 16e          |
| Ca3  | 0.38760  | 0.38760  | 0.38760  | 0.100                          | 16e          |
| Zn1  | 0.17240  | 0.17240  | 0.17240  | 0.380                          | 16e          |
| Zn2  | 0.00000  | 0.00000  | 0.00000  | 0.100                          | 4a           |
| Al1  | 0.00000  | 0.00000  | 0.00000  | 0.100                          | 4a           |
| Zn3  | -0.00230 | 0.25000  | 0.25000  | 0.100                          | 24g          |
| Al2  | -0.00230 | 0.25000  | 0.25000  | 0.100                          | 24g          |
| Zn4  | 0.50000  | 0.50000  | 0.50000  | 0.120                          | 4b           |
| Al3  | 0.50000  | 0.50000  | 0.50000  | 0.120                          | 4b           |
| Mn1  | 0.50000  | 0.50000  | 0.50000  | 0.120                          | 4b           |
| Zn5  | 0.85710  | 0.85710  | 0.85710  | 0.130                          | 16e          |
| Al4  | 0.85710  | 0.85710  | 0.85710  | 0.130                          | 16e          |
| O1   | 0.25000  | 0.25000  | 0.25000  | 0.460                          | 4c           |
| O2   | 0.36980  | 0.00000  | 0.00000  | 0.100                          | 24f          |
| O3   | -0.06670 | -0.06670 | -0.06670 | 0.560                          | 16e          |
| O4   | 0.06590  | 0.25610  | 0.34970  | 0.570                          | 48h          |
| O5   | 0.15040  | 0.25540  | 0.56960  | 0.640                          | 48h          |

**Table S3.** Crystallographic data and refinement parameters of CAZO and CAZO:2.5%Mn.

| Parameters                    | Ca <sub>14</sub> Al <sub>10</sub> Zn <sub>6</sub> O <sub>35</sub> | Ca <sub>14</sub> Al <sub>9.5</sub> Zn <sub>6.25</sub> Mn <sub>0.25</sub> O <sub>35</sub> |
|-------------------------------|-------------------------------------------------------------------|------------------------------------------------------------------------------------------|
| a = b = c (Å)                 | 14.89497                                                          | 14.90359                                                                                 |
| $\alpha = \beta = \gamma$ (°) | 90                                                                | 90                                                                                       |
| V (Å <sup>3</sup> )           | 3304.599                                                          | 3310.340                                                                                 |
| R <sub>p</sub> (%)            | 6.10                                                              | 5.96                                                                                     |
| R <sub>wp</sub> (%)           | 7.93                                                              | 7.75                                                                                     |
| R <sub>exp</sub> (%)          | 7.21                                                              | 7.29                                                                                     |
| $\chi^2$                      | 1.21                                                              | 1.13                                                                                     |

The refinement parameters R<sub>p</sub>, R<sub>wp</sub>, and R<sub>exp</sub> represent the profile R factor, the weighted profile R factor, and the expected R factor, respectively, while  $\chi^2$  means the fitting degree.

**Table S4.** Summary of the ZPL emission energies (in  $\text{cm}^{-1}$ ;  $1 \text{ eV} = 8068 \text{ cm}^{-1}$ ), crystal-field, Racah and nephelauxetic parameters for CAZO:Mn<sup>4+</sup> (this work) and some other Mn<sup>4+</sup>-activated oxide and fluoride phosphors (#)

| Host crystal                                                      | <sup>2</sup> E <sub>g</sub><br>( $\text{cm}^{-1}$ ) | D <sub>q</sub><br>( $\text{cm}^{-1}$ ) | B<br>( $\text{cm}^{-1}$ ) | C<br>( $\text{cm}^{-1}$ ) | Dq/B  | $\beta_1$ | 4B+3C<br>( $\text{cm}^{-1}$ ) | 7B+3.1C<br>( $\text{cm}^{-1}$ ) |
|-------------------------------------------------------------------|-----------------------------------------------------|----------------------------------------|---------------------------|---------------------------|-------|-----------|-------------------------------|---------------------------------|
| Ca <sub>14</sub> Al <sub>10</sub> Zn <sub>6</sub> O <sub>35</sub> | 14388                                               | 1887                                   | 644                       | 3179                      | 2.930 | 0.924     | 12113                         | 14363                           |
| Ca <sub>3</sub> Al <sub>4</sub> ZnO <sub>10</sub>                 | 14329                                               | 1825                                   | 495                       | 3500                      | 3.687 | 0.919     | 12480                         | 14315                           |
| CaMg <sub>2</sub> Al <sub>16</sub> O <sub>27</sub>                | 15216                                               | 1790                                   | 495                       | 3785                      | 3.616 | 0.978     | 13335                         | 15199                           |
| Sr <sub>2</sub> MgAl <sub>22</sub> O <sub>36</sub>                | 15208                                               | 1720                                   | 565                       | 3635                      | 3.044 | 0.975     | 13165                         | 15224                           |
| BaZnAl <sub>10</sub> O <sub>17</sub>                              | 15063                                               | 1815                                   | 675                       | 3345                      | 2.689 | 0.971     | 12735                         | 15095                           |
| MgAl <sub>2</sub> O <sub>4</sub>                                  | 15370                                               | 1870                                   | 600                       | 3600                      | 3.117 | 0.984     | 13200                         | 15360                           |
| Ca <sub>3</sub> La <sub>2</sub> W <sub>2</sub> O <sub>12</sub>    | 14119                                               | 1640                                   | 540                       | 3335                      | 3.037 | 0.904     | 12165                         | 14119                           |
| K <sub>2</sub> BaGe <sub>8</sub> O <sub>18</sub>                  | 15345                                               | 1825                                   | 695                       | 3395                      | 2.626 | 0.991     | 12965                         | 15390                           |
| CaMgYSbO <sub>6</sub>                                             | 14563                                               | 1620                                   | 655                       | 3235                      | 2.473 | 0.940     | 12325                         | 14614                           |
| La <sub>2</sub> LiTaO <sub>6</sub>                                | 14426                                               | 1785                                   | 480                       | 3565                      | 3.719 | 0.926     | 12615                         | 14412                           |
| Lu <sub>3</sub> Al <sub>5</sub> O <sub>12</sub>                   | 15281                                               | 1895                                   | 475                       | 3855                      | 3.989 | 0.985     | 13465                         | 15276                           |
| Mg <sub>6</sub> As <sub>2</sub> O <sub>11</sub>                   | 15620                                               | 1790                                   | 710                       | 3455                      | 2.521 | 1.010     | 13205                         | 15681                           |
| Sr <sub>3</sub> SiAl <sub>10</sub> O <sub>20</sub>                | 15119                                               | 1695                                   | 720                       | 3270                      | 2.354 | 0.981     | 12690                         | 15177                           |
| CaTiO <sub>3</sub>                                                | 14143                                               | 1805                                   | 605                       | 3190                      | 2.983 | 0.906     | 11990                         | 14124                           |
| K <sub>2</sub> TiF <sub>6</sub>                                   | 16063                                               | 2000                                   | 495                       | 4055                      | 4.040 | 1.034     | 14145                         | 16036                           |
| Na <sub>2</sub> SiF <sub>6</sub>                                  | 16192                                               | 1970                                   | 540                       | 4000                      | 3.648 | 1.040     | 14160                         | 16180                           |
| Li <sub>2</sub> SiF <sub>6</sub>                                  | 16136                                               | 2009                                   | 505                       | 4060                      | 3.978 | 1.039     | 14200                         | 16121                           |
| (NH <sub>4</sub> ) <sub>2</sub> GeF <sub>6</sub>                  | 16023                                               | 1975                                   | 515                       | 4000                      | 3.835 | 1.030     | 14060                         | 16005                           |
| BaTiF <sub>6</sub>                                                | 15975                                               | 1950                                   | 565                       | 3875                      | 3.451 | 1.024     | 13885                         | 15968                           |
| K <sub>3</sub> HfF <sub>7</sub>                                   | 16104                                               | 1865                                   | 605                       | 3830                      | 3.083 | 1.032     | 13910                         | 16108                           |
| Na <sub>3</sub> ZrF <sub>7</sub>                                  | 16088                                               | 2009                                   | 525                       | 3995                      | 3.827 | 1.033     | 14085                         | 16060                           |
| Na <sub>3</sub> TaF <sub>8</sub>                                  | 16152                                               | 1960                                   | 545                       | 3980                      | 3.596 | 1.037     | 14120                         | 16153                           |
| Na <sub>5</sub> Zr <sub>2</sub> F <sub>13</sub>                   | 16225                                               | 1975                                   | 555                       | 3980                      | 3.559 | 1.041     | 14160                         | 16223                           |
| K <sub>2</sub> NbF <sub>7</sub>                                   | 16152                                               | 1880                                   | 475                       | 4140                      | 3.958 | 1.046     | 14320                         | 16159                           |
| KTeF <sub>5</sub>                                                 | 16120                                               | 1975                                   | 615                       | 3805                      | 3.211 | 1.031     | 13875                         | 16101                           |
| Cs <sub>2</sub> SnF <sub>6</sub>                                  | 16047                                               | 1920                                   | 475                       | 4105                      | 4.042 | 1.038     | 14215                         | 16051                           |
| Rb <sub>2</sub> KAlF <sub>6</sub>                                 | 16152                                               | 1930                                   | 480                       | 4130                      | 4.021 | 1.045     | 14310                         | 16163                           |

# Cited from Ref. [S. Adachi, Review-Mn<sup>4+</sup>-Activated Red and Deep Red-Emitting Phosphors, *ECS J. Solid State Sci. Technol.*, 2019, **9**, 016001].

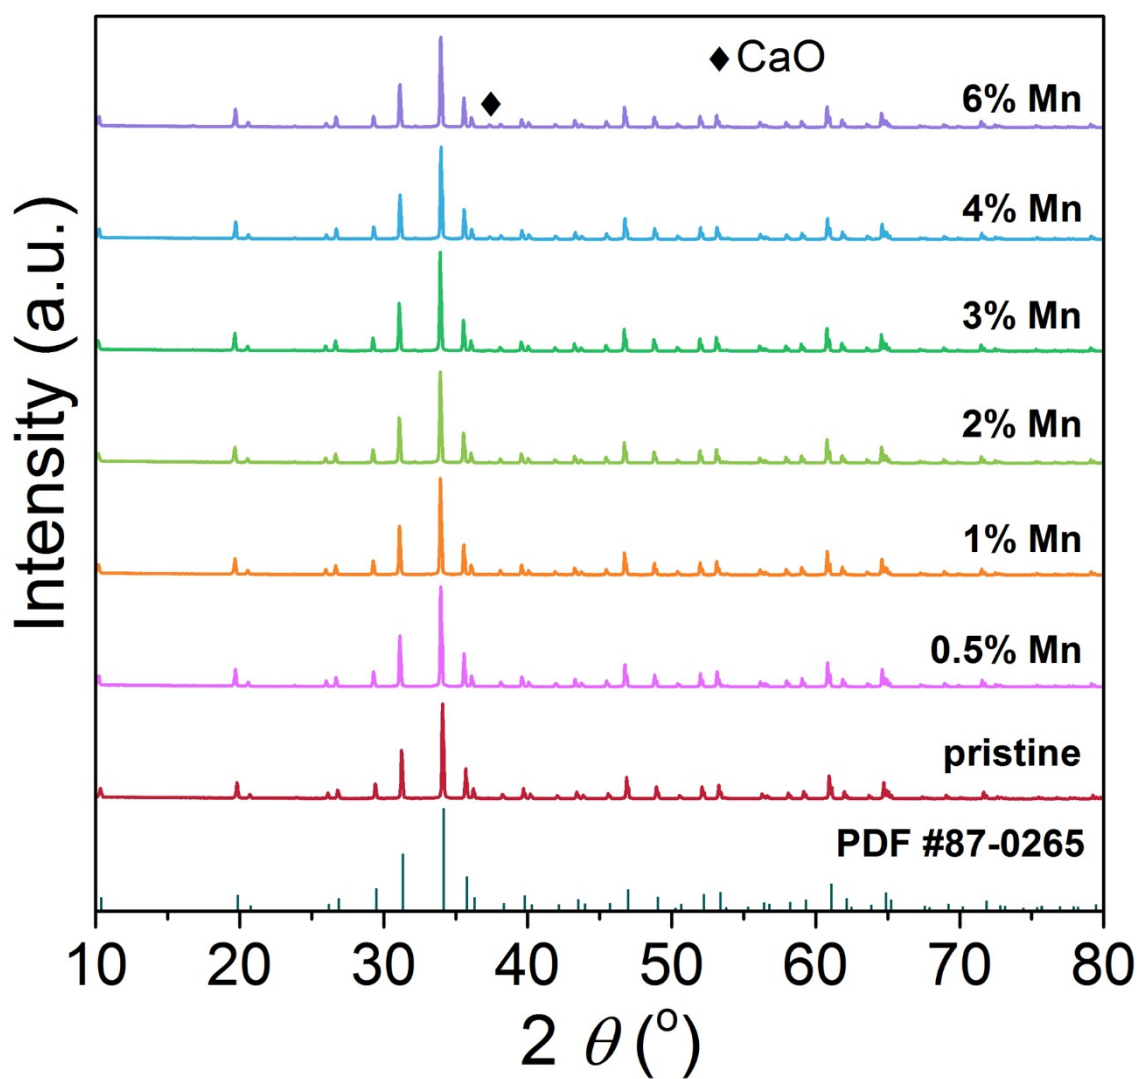

Fig.S1 XRD patterns of the pristine and Mn-doped  $\text{Ca}_{14}\text{Al}_{10}\text{Zn}_6\text{O}_{35}$  powders.

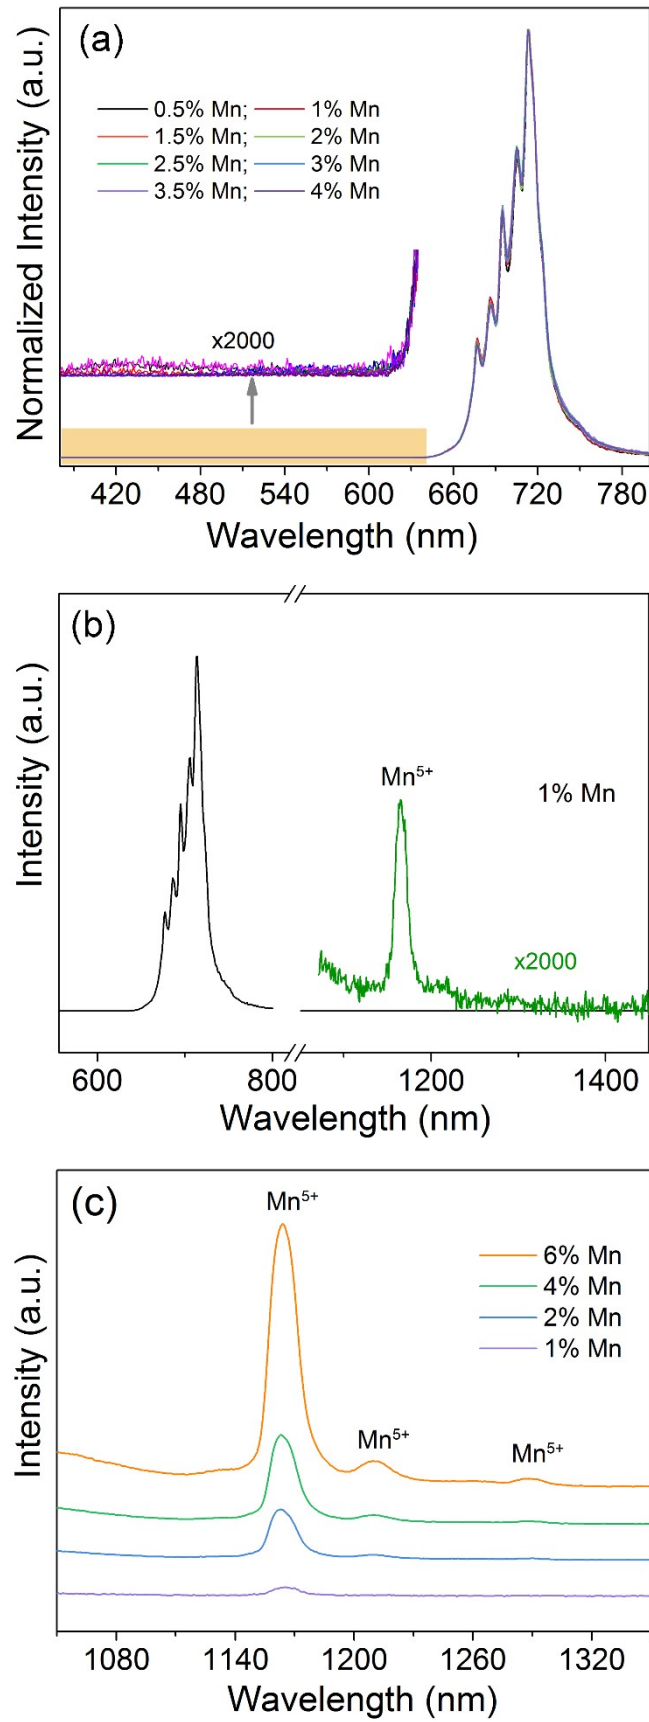

**Fig. S2** PL ( $\lambda_{\text{ex}} = 340$  nm) spectra of (a) CAZO:Mn<sup>4+</sup> with different doping concentrations in the visible region

(emission wavelength range: 380-820 nm), (b) CAZO:1%Mn with emission wavelength range of 550-800 nm and 1050-1450 nm (the green line shows the enlarged spectrum in the wavelength range of 1070-1450 nm), and (c) CAZO:Mn<sup>4+</sup> with different doping concentrations in the infrared region (emission wavelength range: 1050-1350 nm).



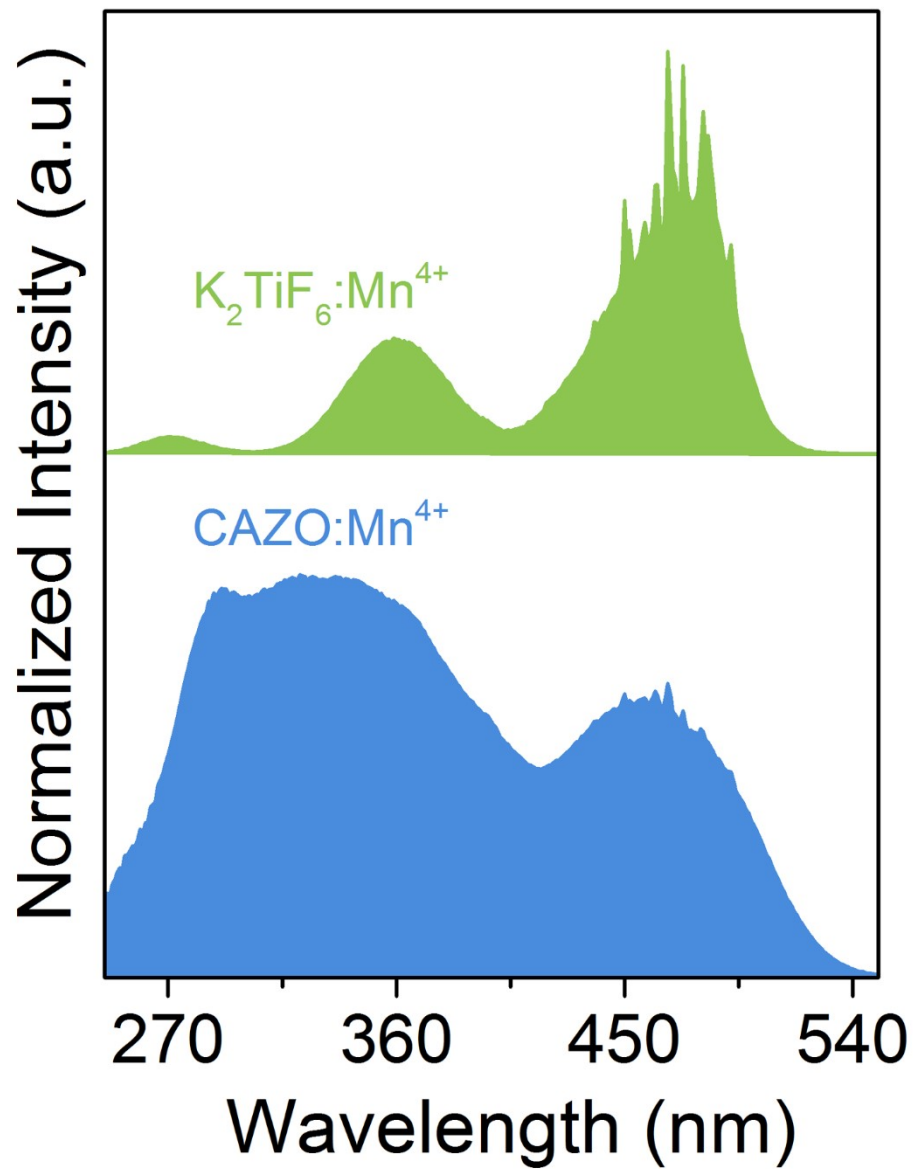

Fig. S3 Comparison of the PLE spectra of  $CAZO:Mn^{4+}$  and  $K_2TiF_6:Mn^{4+}$  at 300 K.

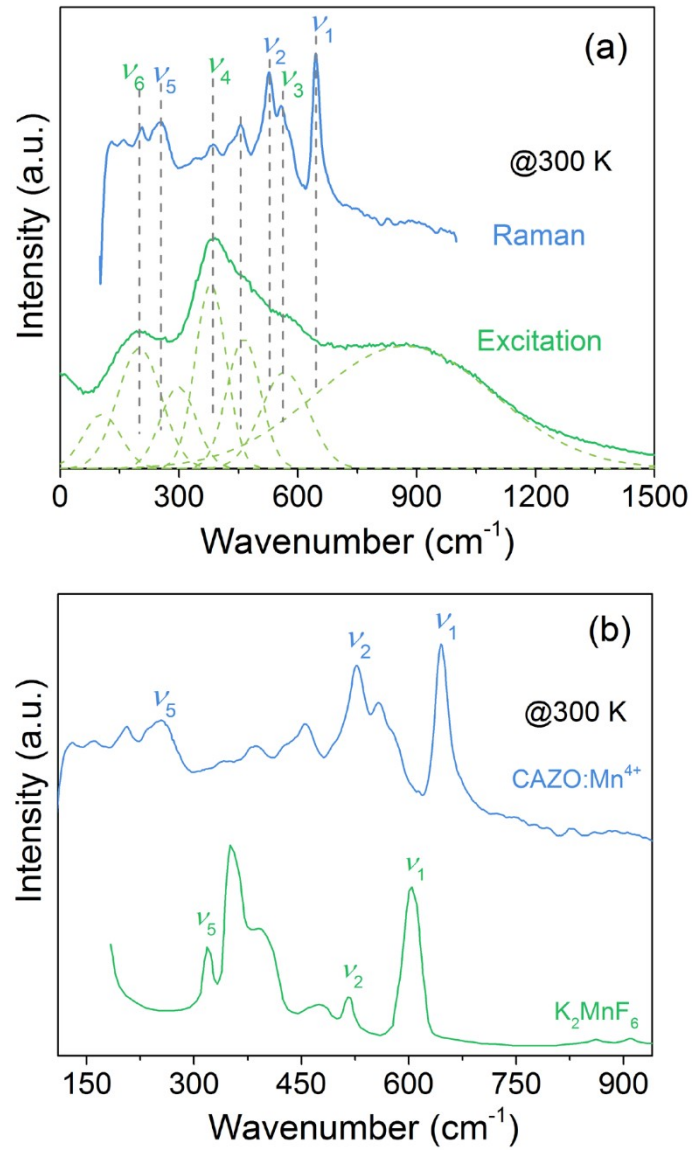

**Fig. S4** Comparison of (a) the PLE and Raman spectra of CAZO:Mn<sup>4+</sup>, (b) Raman spectra of CAZO:Mn<sup>4+</sup> and K<sub>2</sub>MnF<sub>6</sub>.

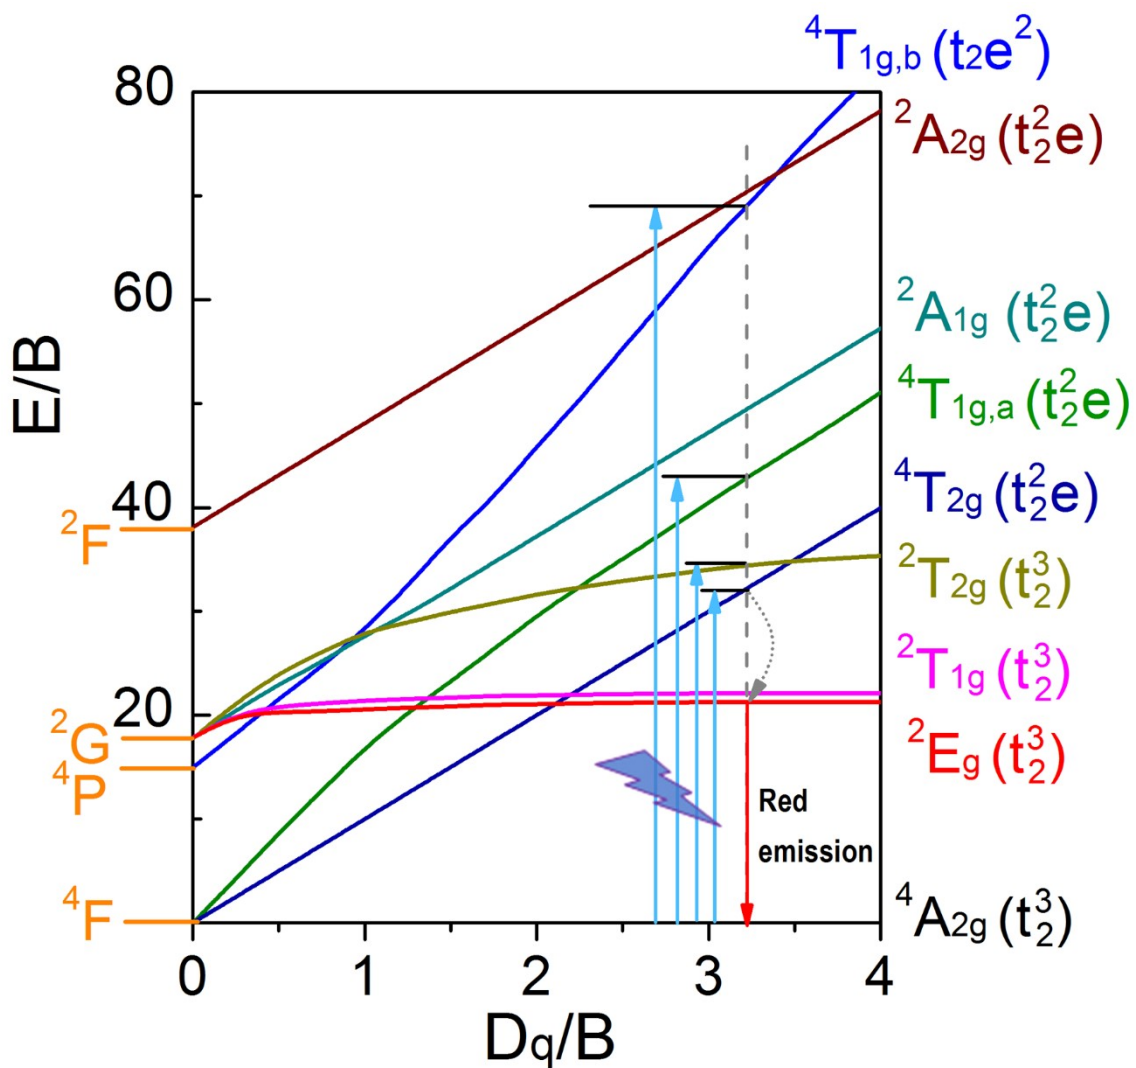

Fig. S5 Tanabe-Sugano energy-level diagram for  $Mn^{4+}$  in octahedral symmetry.

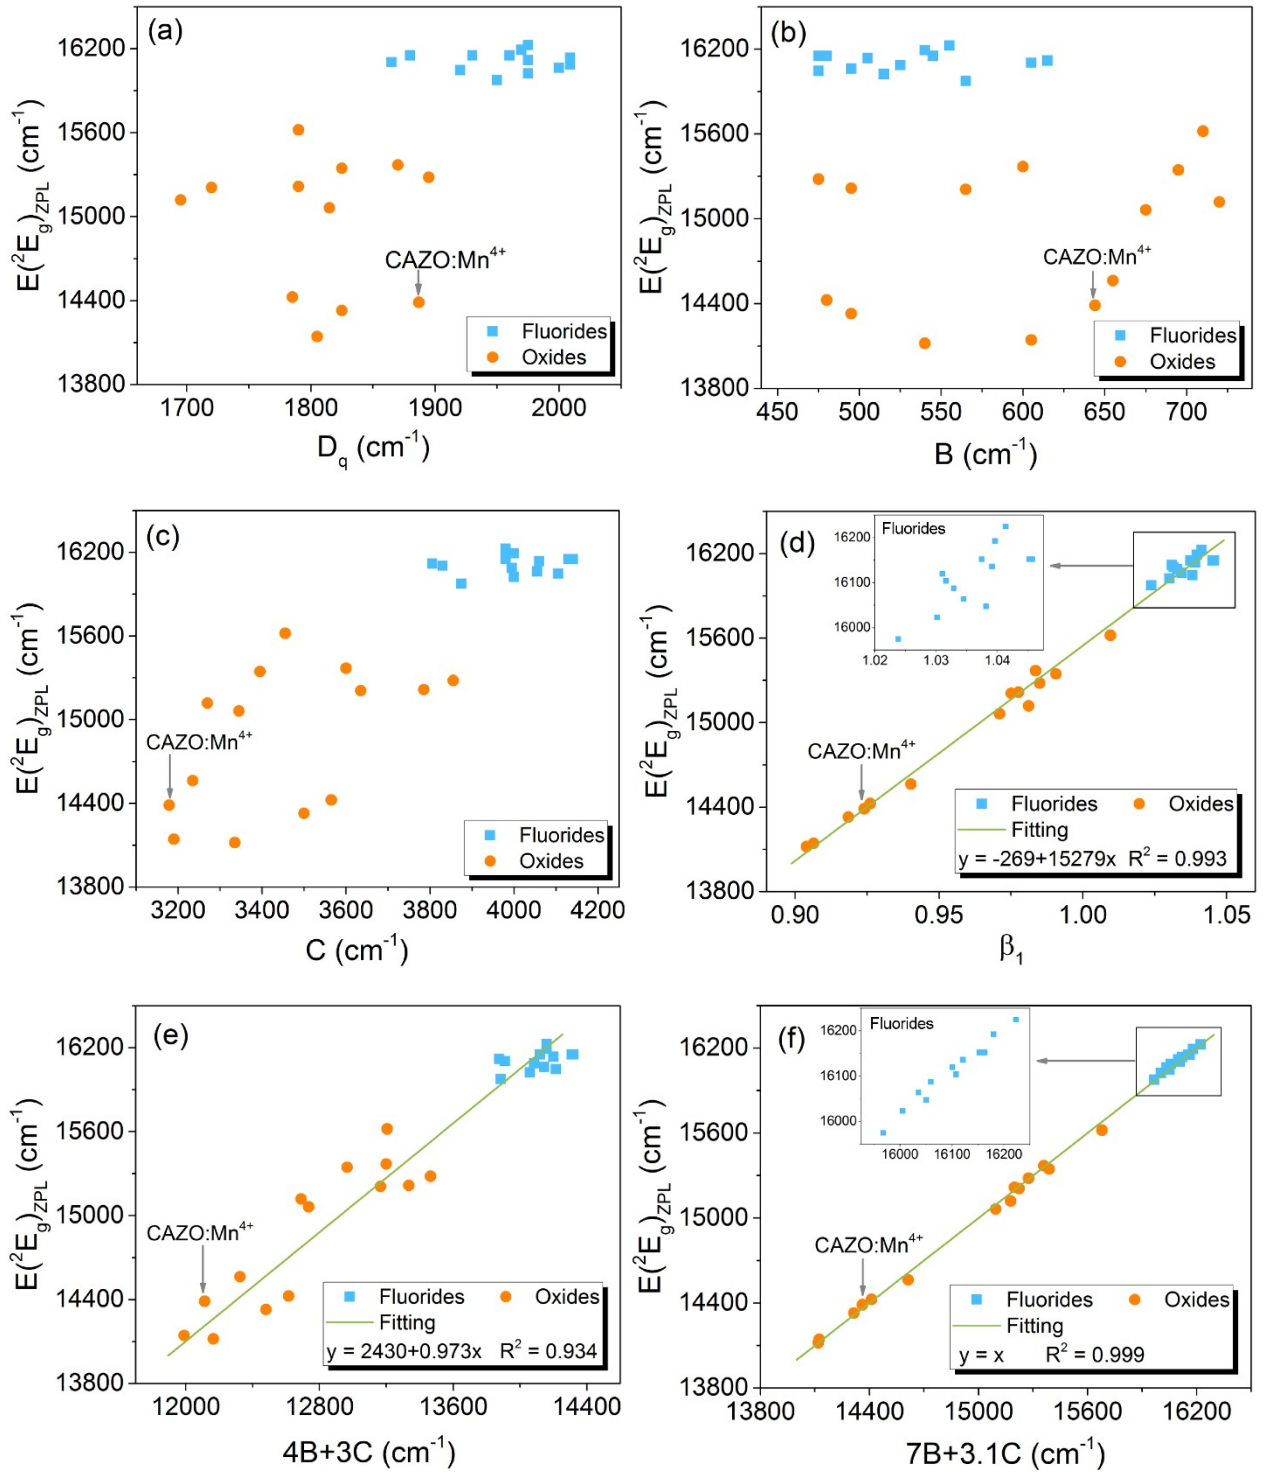

**Fig. S6** Dependence of the ZPL emission Energy  $E^2(E_g)_{ZPL}$  on the crystal field, Racah and nephelauxetic parameters.

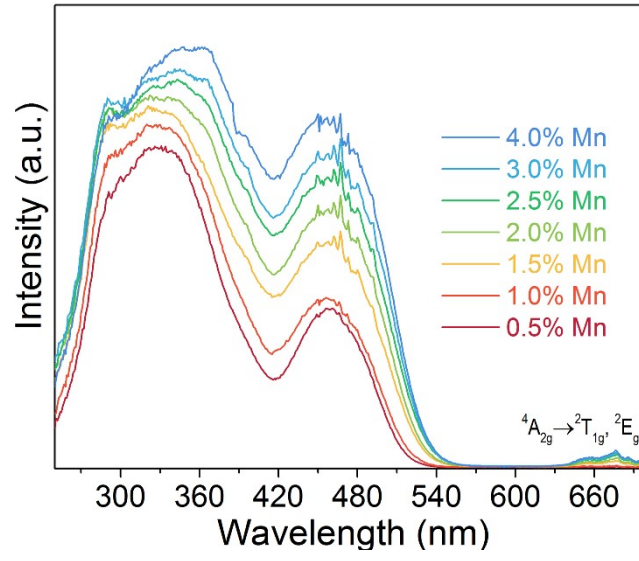

**Fig. S7** Excitation spectra of the CAZO:Mn<sup>4+</sup> phosphors ( $\lambda_{em} = 713$  nm).

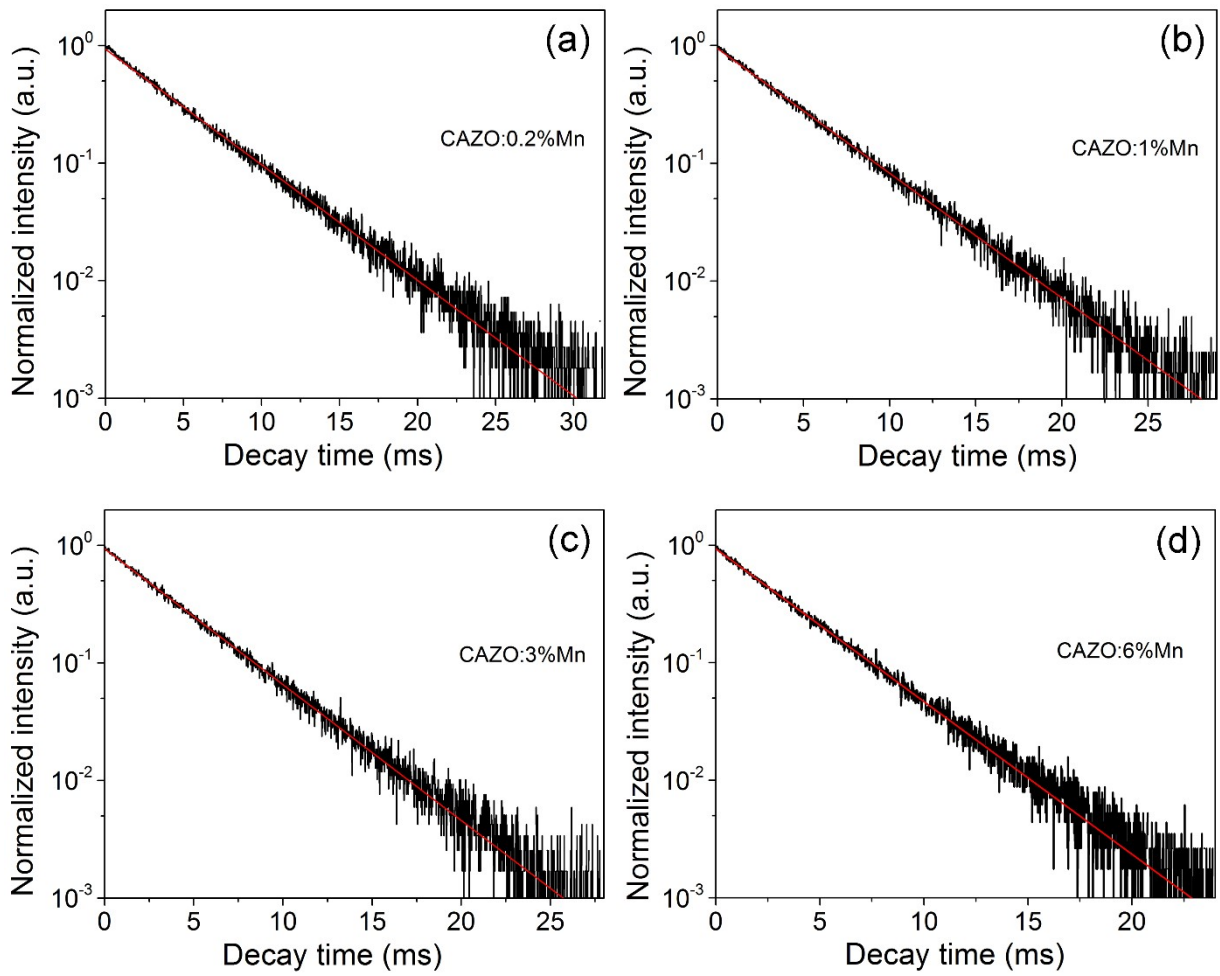

**Fig. S8** PL decay curves and the corresponding mono-exponential fitting (red lines) of CAZO:Mn<sup>4+</sup> phosphors at 300 K ( $\lambda_{\text{ex}} = 325$  nm,  $\lambda_{\text{em}} = 713$  nm).

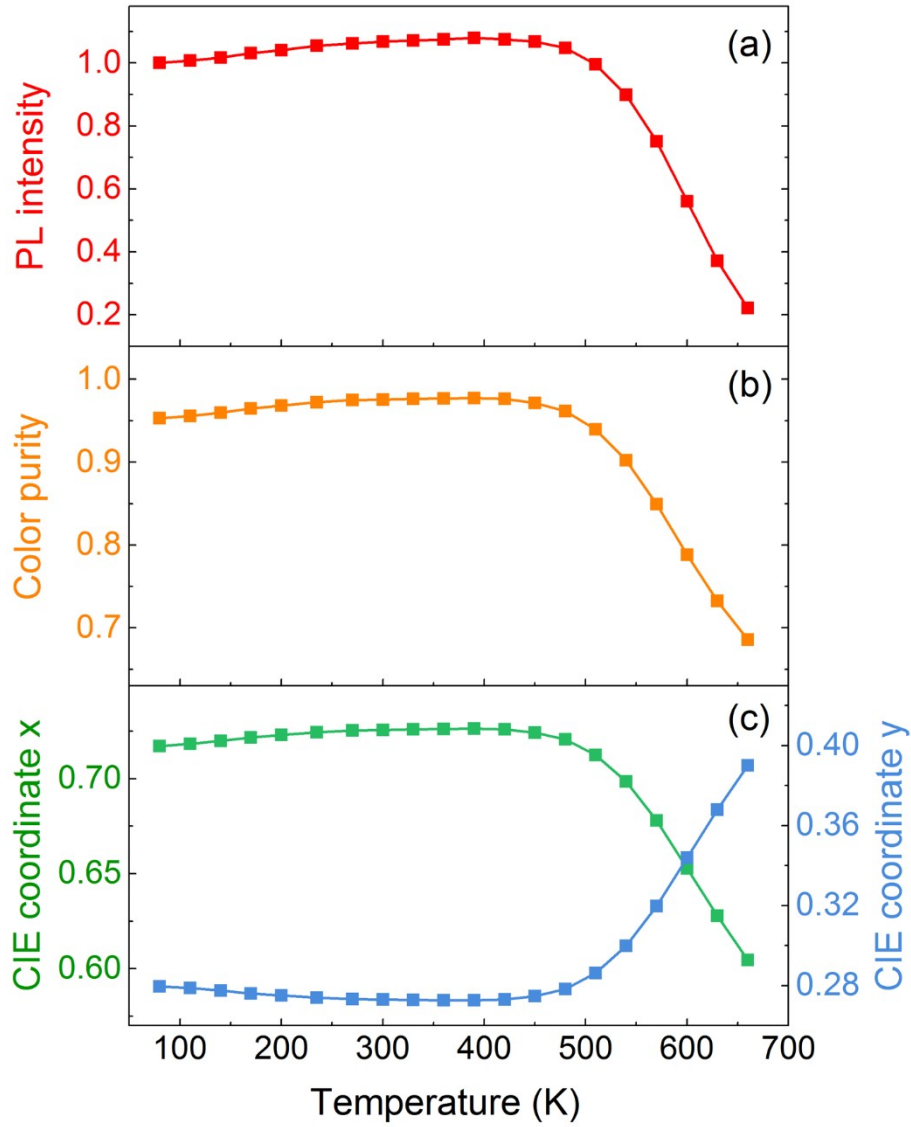

**Fig. S9** Dependence of the emission intensity (a), color purity (b) and CIE chromaticity coordinates (c) of CAZO:0.5%Mn on temperature.

The color purity was calculated by using the following equation:

$$Color\ purity = \frac{\sqrt{(x - x_i)^2 + (y - y_i)^2}}{\sqrt{(x_d - x_i)^2 + (y_d - y_i)^2}} \times 100\%$$

where  $(x, y)$ ,  $(x_i, y_i)$ , and  $(x_d, y_d)$  are the CIE chromaticity coordinates of the sample, the standard white illumination with a value of (0.33, 0.33), and the dominated wavelength, respectively.

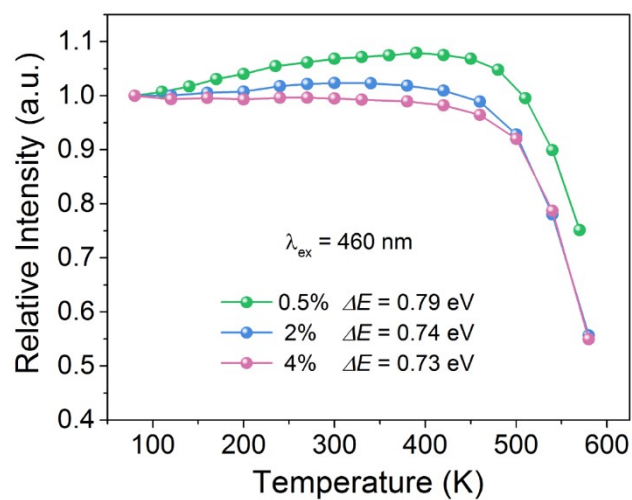

**Fig. S10** Comparison of the temperature-dependent emission intensity for CAZO: Mn<sup>4+</sup> phosphors with different Mn-doping concentration under excitation at 460nm.



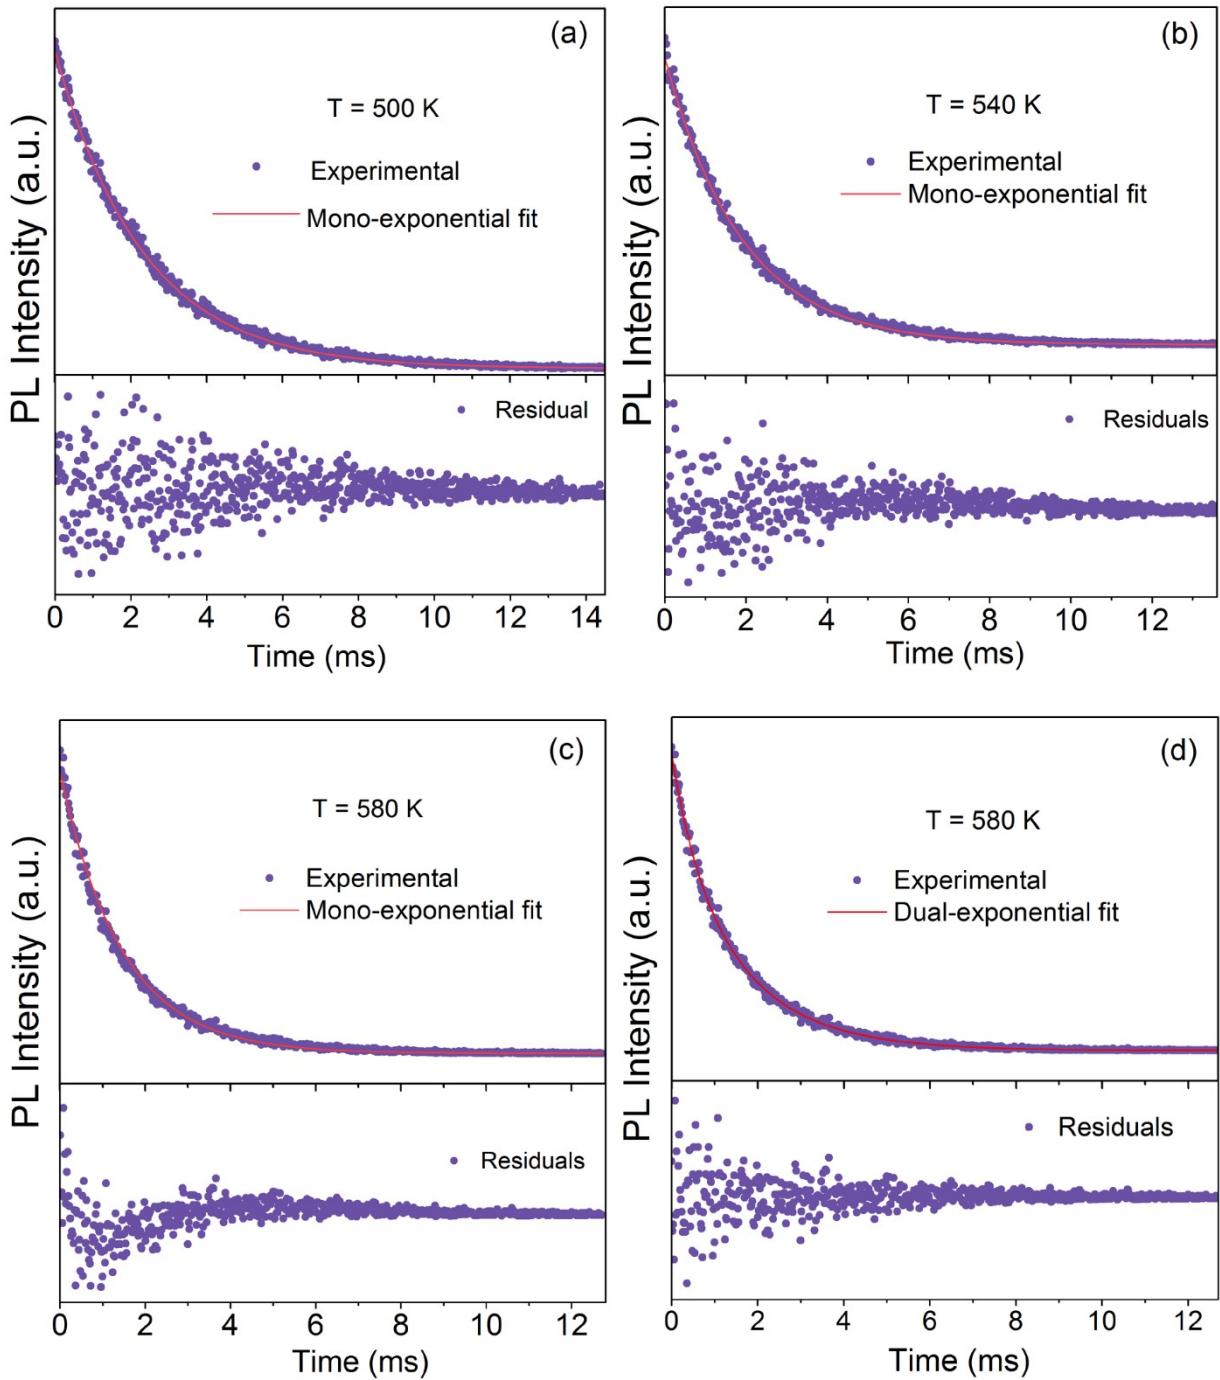

**Fig. S11** Decay curves of CAZO:0.5%Mn phosphor ( $\lambda_{\text{ex}} = 460$  nm,  $\lambda_{\text{em}} = 713$  nm) at  $T = 500$  K (a), 540 K (b) and 580 K (c, d). The upper panel shows the mono-exponential fit of the experimental data, and the bottom panel shows the fit residuals.
